# Supplementary material
Source: PubMed Central journal article supplement (PMC5576806)
Supplement: pnas.1705052114.sapp.pdf [file pnas.1705052114.sapp.pdf]

# SI Appendix: High-Precision Chronology for Central American Maize Diversification from El Gigante Rockshelter, Honduras

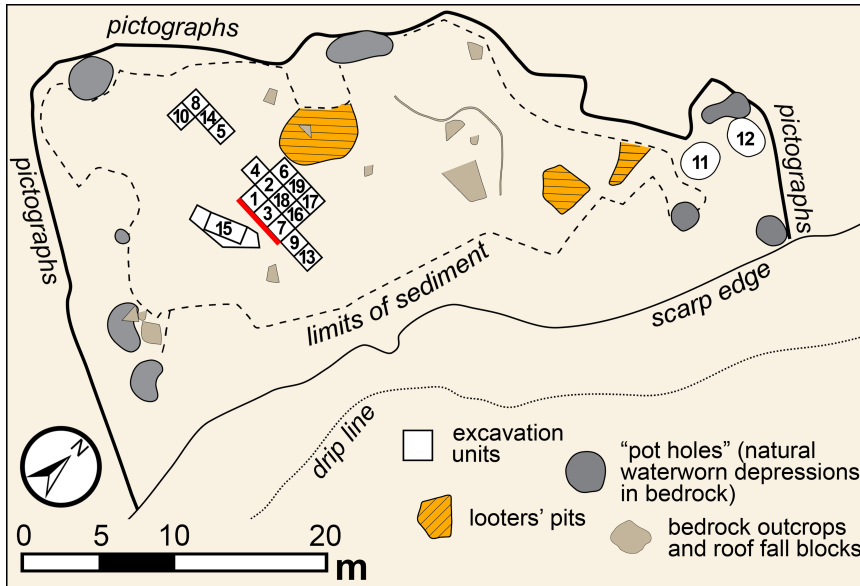

**Fig. S1.** Plan view of the El Gigante rockshelter.

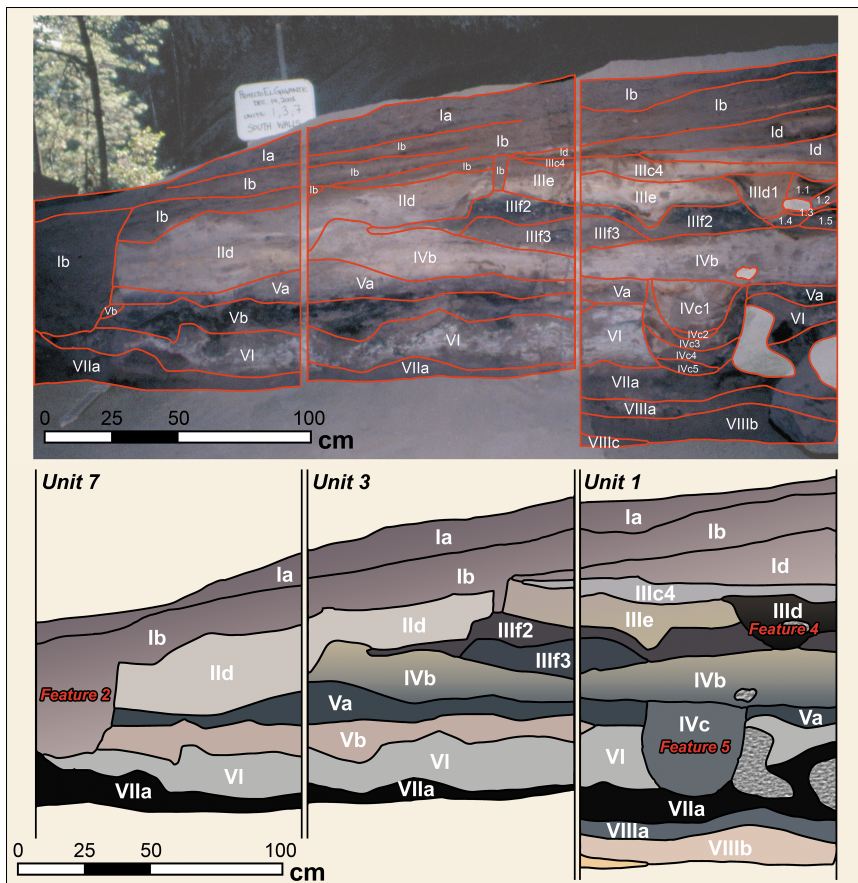

**Fig. S2.** An example of site stratigraphy at El Gigante (Units 1, 3 and 7, south profile).

**Table S1.** Maize cobs from El Gigante directly dated by AMS <sup>14</sup>C.

| Lab No.         | PSU No.  | Sample ID | Conventional <sup>14</sup> C yrs BP | 2σ range (cal BP) | Provenience                                   |
|-----------------|----------|-----------|-------------------------------------|-------------------|-----------------------------------------------|
| UCIAMS-128441   | PSU-5630 | EG70      | 3870 ± 15                           | 4407 – 4240       | Unit 7, level 9, stratum II d                 |
| UCIAMS-128444*  | PSU-5633 | EG73      | 3830 ± 15                           | 4288 – 4153       | Unit 18, level 18, stratum II d               |
| UCIAMS-90933†   | PSU-4732 | EG10      | 3825 ± 20                           | 4295 – 4148       | Unit 1, level 11, feature 4, stratum III d    |
| UCIAMS-127387   | PSU-5605 | EG66      | 3815 ± 20                           | 4287 – 4101       | Unit 6, level 19, stratum II a                |
| UCIAMS-127384   | PSU-5602 | EG63      | 3780 ± 25                           | 4237 – 4087       | Unit 19, level 21, stratum II c               |
| UCIAMS-127386   | PSU-5604 | EG65      | 3775 ± 20                           | 4234 – 4086       | Unit 6, level 18, stratum II a                |
| UCIAMS-130720   | PSU-5693 | EG74      | 3765 ± 25                           | 4235 – 4006       | Unit 19, level 21, stratum II c               |
| UCIAMS-130721   | PSU-5694 | EG75      | 3745 ± 25                           | 4224 – 3988       | Unit 19, level 21, stratum II c               |
| UCIAMS-93254    | PSU-4754 | EG14      | 3740 ± 20                           | 4154 – 3991       | Unit 19, level 21, stratum II c               |
| UCIAMS-130722   | PSU-5695 | EG76      | 3735 ± 25                           | 4154 – 3985       | Unit 19, level 21, stratum II c               |
| UCIAMS-93253    | PSU-4753 | EG12      | 3730 ± 20                           | 4150 – 3988       | Unit 7, level 9, stratum II d                 |
| Beta-159055     | --       | S04       | 2280 ± 40                           | 2353 – 2157       | Unit 2, Level 14a, stratum I c/II c int.      |
| UCIAMS-127385*† | PSU-5603 | EG64      | 2270 ± 20                           | 2346 – 2182       | Unit 19, level 21, stratum II c               |
| UCIAMS-173149   | PSU-6945 | EG79      | 2260 ± 15                           | 2341 – 2182       | Unit 1, level 5, stratum I b                  |
| UCIAMS-128443*  | PSU-5632 | EG72      | 2250 ± 15                           | 2338 – 2160       | Unit 18, level 17, stratum II b2              |
| UCIAMS-90934    | PSU-4733 | EG11      | 2240 ± 20                           | 2333 – 2158       | Unit 3, level 9, stratum I b, feature 2       |
| UCIAMS-90935    | PSU-4734 | EG13      | 2240 ± 20                           | 2333 – 2158       | Unit 18, level 21, stratum I b2               |
| UCIAMS-128442*  | PSU-5631 | EG71      | 2220 ± 15                           | 2314 – 2155       | Unit 18, level 15, stratum I b                |
| UCIAMS-173151   | PSU-6947 | EG81      | 2220 ± 15                           | 2314 – 2155       | Unit 1, level 6, stratum I b                  |
| UCIAMS-173150   | PSU-6946 | EG80      | 2215 ± 15                           | 2312 – 2154       | Unit 1, level 6, stratum I b                  |
| UCIAMS-173153   | PSU-6949 | EG83      | 2215 ± 15                           | 2312 – 2154       | Unit 2, level 5, stratum I a/I b              |
| UCIAMS-173159   | PSU-6955 | EG89      | 2210 ± 15                           | 2310 – 2153       | Unit 18, level 13b, stratum II b2             |
| UCIAMS-127383*† | PSU-5601 | EG62      | 2175 ± 20                           | 2306 – 2120       | Unit 1, level 12, stratum III                 |
| UCIAMS-173156   | PSU-6952 | EG86      | 2170 ± 15                           | 2304 – 2120       | Unit 3, level 8, stratum I b                  |
| UCIAMS-173160   | PSU-6956 | EG90      | 2165 ± 15                           | 2302 – 2119       | Unit 18, level 14, stratum I b2               |
| UCIAMS-173158   | PSU-6954 | EG88      | 2165 ± 15                           | 2302 – 2119       | Unit 18, level 8, stratum I b                 |
| UCIAMS-173148   | PSU-6944 | EG78      | 2155 ± 20                           | 2303 – 2063       | Unit 1, level 4, stratum I a                  |
| UCIAMS-173155   | PSU-6951 | EG85      | 2155 ± 15                           | 2300 – 2069       | Unit 2, level 6, stratum I b/I c              |
| UCIAMS-173152   | PSU-6948 | EG82      | 2135 ± 15                           | 2292 – 2056       | Unit 2, level 5, stratum I a/I b              |
| Beta-171701     | --       | S03       | 2010 ± 40                           | 2103 – 1876       | Unit 18, level 20, stratum I b2               |
| UCIAMS-93255    | PSU-4755 | EG15      | 1950 ± 15                           | 1944 – 1866       | Unit 19, level 5, stratum I b, feature 2      |
| UCIAMS-127389*  | PSU-5607 | EG68      | 1945 ± 20                           | 1945 – 1828       | Unit 16, level 17, stratum I d/II d interface |
| UCIAMS-127388*  | PSU-5606 | EG67      | 1945 ± 20                           | 1945 – 1828       | Unit 16, level 16, stratum I d                |
| UCIAMS-128440   | PSU-5629 | EG69      | 1925 ± 15                           | 1919 – 1825       | Unit 7, level 8, stratum I d/II d interface   |
| UCIAMS-173154   | PSU-6950 | EG84      | 1880 ± 15                           | 1877 – 1741       | Unit 2, level 6, stratum I b/I c              |
| UCIAMS-173157†  | PSU-6953 | EG87      | 1775 ± 15                           | 1733 – 1619       | Unit 18, level 3, stratum I b                 |
| UCIAMS-173147   | PSU-6943 | EG77      | 1285 ± 15                           | 1278 – 1182       | Unit 1, level 3, stratum I a                  |

\* – sample derived from carbonized maize cobs

† – date omitted from age model

**Table S2.** OxCal tabular output (<sup>A</sup>model = 102.4; <sup>A</sup>overall = 101.4).

| Lab no.                                         | PSU no.  | Sample ID | Provenience                                        | Sample material                  | <sup>14</sup> C BP | Unmodeled (BP; 2σ) | Modeled (BP; 2σ) | A     | C    |
|-------------------------------------------------|----------|-----------|----------------------------------------------------|----------------------------------|--------------------|--------------------|------------------|-------|------|
| <i>Boundary Earliest</i>                        |          |           |                                                    |                                  |                    |                    | 13347 – 10780    | 86.3  |      |
| <i>Boundary Start Esperanza</i>                 |          |           |                                                    |                                  |                    |                    | 11114 – 10773    | 99.0  |      |
| <b>Early Esperanza (V-IV)</b>                   |          |           |                                                    |                                  |                    |                    |                  |       |      |
| Beta-156246                                     | ---      | S12       | Unit 3, level 24, stratum Va                       | charcoal                         | 9600 ± 60          | 11169 – 10746      | 11010 – 10700    | 95.8  | 99.7 |
| Beta-156245                                     | ---      | S11       | Unit 1, levels 19-22, fea. 5, stratum IVc3         | charcoal                         | 9590 ± 60          | 11163 – 10738      | 11012 – 10696    | 97.0  | 99.6 |
| UCIAMS-90929                                    | PSU-4728 | EG06      | Unit 4, level 19, stratum VI                       | <i>Spondias</i> sp.              | 9550 ± 35          | 11085 – 10716      | 11032 – 10703    | 94.5  | 99.8 |
| UCIAMS-120931                                   | PSU-5394 | EG60      | Unit 18, level 38, stratum Va                      | charcoal                         | 9550 ± 25          | 11077 – 10726      | 11040 – 10713    | 90.3  | 99.8 |
| UCIAMS-112164                                   | PSU-5190 | EG49      | Unit 16, level 20b, stratum Vb                     | cf. zapote husk                  | 9455 ± 20          | 10755 – 10599      | 10754 – 10599    | 100.2 | 99.8 |
| UCIAMS-90928                                    | PSU-4727 | EG05      | Unit 4, level 15, stratum IVb                      | <i>Spondias</i> sp.              | 9375 ± 25          | 10680 – 10520      | 10680 – 10519    | 100.0 | 99.8 |
| UCIAMS-90927                                    | PSU-4726 | EG04      | Unit 3, level 26, stratum VI                       | <i>Spondias</i> sp.              | 9375 ± 25          | 10680 – 10520      | 10680 – 10520    | 100.0 | 99.8 |
| UCIAMS-108394                                   | PSU-5057 | EG25      | Unit 6, level 27a, stratum IVb, feature 6-4 (pit)  | single twig                      | 9335 ± 20          | 10646 – 10497      | 10646 – 10497    | 100.0 | 99.8 |
| UCIAMS-90931                                    | PSU-4730 | EG08      | Unit 18, level 40, stratum VI                      | <i>Spondias</i> sp.              | 9325 ± 30          | 10650 – 10428      | 10650 – 10427    | 99.9  | 99.7 |
| UCIAMS-93256                                    | PSU-4756 | EG19      | Unit 2, level 20, stratum IVb                      | <i>Spondias</i> sp.              | 9315 ± 25          | 10585 – 10428      | 10585 – 10428    | 99.9  | 99.8 |
| UCIAMS-108399                                   | PSU-5062 | EG33      | Unit 18, level 33a, stratum IV, below feature 18-4 | single twig                      | 9310 ± 20          | 10578 – 10432      | 10578 – 10433    | 100.0 | 99.8 |
| Beta-171699                                     | ---      | S15       | Unit 1, level 23b, stratum VIIIa                   | cordage                          | 9290 ± 40          | 10586 – 10298      | 10586 – 10298    | 100.3 | 99.7 |
| UCIAMS-90932                                    | PSU-4731 | EG09      | Unit 18, level 41, stratum VIIa                    | <i>Spondias</i> sp.              | 9270 ± 25          | 10563 – 10301      | 10563 – 10301    | 100.3 | 99.7 |
| Beta-171700                                     | ---      | S14       | Unit 3, level 28, stratum VI                       | quid                             | 9240 ± 40          | 10541 – 10262      | 10543 – 10266    | 100.6 | 99.7 |
| Beta-171706                                     | ---      | S13       | Unit 19, level 37, stratum Vb                      | charcoal                         | 9210 ± 60          | 10543 – 10241      | 10547 – 10244    | 100.2 | 99.7 |
| UCIAMS-120929                                   | PSU-5392 | EG58      | Unit 16, level 18, stratum IVb                     | <i>Spondias</i> sp.              | 9190 ± 20          | 10413 – 10252      | 10415 – 10252    | 99.6  | 99.8 |
| UCIAMS-116848                                   | PSU-5328 | EG50      | Unit 1, level 17a, stratum IVb                     | charcoal                         | 9105 ± 30          | 10370 – 10202      | 10386 – 10218    | 81.2  | 99.8 |
| <i>Boundary Early-Late Esperanza transition</i> |          |           |                                                    |                                  |                    |                    | 10355 – 10084    | 99.7  |      |
| <b>Late Esperanza (IV-III interface)</b>        |          |           |                                                    |                                  |                    |                    |                  |       |      |
| UCIAMS-115015                                   | PSU-5248 | EG48      | Unit 18, level 31, str. III/IV interface           | <i>Spondias</i> sp. (carbonized) | 8880 ± 25          | 10158 – 9907       | 10157 – 9906     | 100.0 | 99.7 |

| Lab no.       | PSU no.  | Sample ID | Provenience                             | Sample material     | <sup>14</sup> C BP | Unmodeled (BP; 2σ) | Modeled (BP; 2σ) | A     | C    |
|---------------|----------|-----------|-----------------------------------------|---------------------|--------------------|--------------------|------------------|-------|------|
| UCIAMS-117703 | PSU-5353 | EG52      | Unit 2, level 19b, stratum IV           | charcoal            | 8835 ± 25          | 10147 – 9741       | 10146 – 9741     | 100.1 | 99.7 |
| UCIAMS-117707 | PSU-5357 | EG56      | Unit 4, level 14, str. III/IV interface | <i>Spondias</i> sp. | 8790 ± 20          | 9902 – 9704        | 9902 – 9703      | 100.0 | 99.7 |
| UCIAMS-108404 | PSU-5067 | EG38      | Unit 19, level 35, stratum IVb          | single wood         | 8670 ± 20          | 9673 – 9549        | 9675 – 9550      | 97.2  | 99.9 |
| UCIAMS-108390 | PSU-5053 | EG20      | Unit 1, level 15, stratum IVb           | single wood         | 8665 ± 20          | 9671 – 9547        | 9673 – 9548      | 96.3  | 99.8 |

*Boundary End Esperanza*

9644 – 9148 99.5

*Boundary Begin Marcala*

9413 – 8770 99.5

### Early Marcala (III<sub>f</sub>-III<sub>e</sub>)

|               |          |      |                                                           |                        |            |             |             |       |      |
|---------------|----------|------|-----------------------------------------------------------|------------------------|------------|-------------|-------------|-------|------|
| UCIAMS-90937  | PSU-4736 | EG17 | Unit 19, level 34, stratum III <sub>f</sub> 2, feature 14 | quid                   | 7985 ± 25  | 8996 – 8728 | 8991 – 8724 | 96.6  | 99.8 |
| UCIAMS-108393 | PSU-5056 | EG24 | Unit 6, level 24, stratum III <sub>f</sub>                | single wood            | 7925 ± 20  | 8972 – 8636 | 8969 – 8635 | 103.3 | 99.8 |
| UCIAMS-120930 | PSU-5393 | EG59 | Unit 18, level 30, stratum III <sub>f</sub> 2             | <i>Spondias</i> sp.    | 7205 ± 25  | 8149 – 7958 | 8149 – 7958 | 99.9  | 99.9 |
| Beta-156244   | ---      | S09  | Unit 3, levels 15-17, stratum III <sub>f</sub> 2          | charcoal               | 7140 ± 200 | 8354 – 7618 | 8349 – 7654 | 101.3 | 99.2 |
| UCIAMS-112162 | PSU-5188 | EG46 | Unit 19, level 28, stratum IV <sub>a</sub>                | avocado seed (charred) | 6985 ± 20  | 7924 – 7753 | 7924 – 7753 | 99.9  | 99.9 |
| UCIAMS-108398 | PSU-5061 | EG32 | Unit 18, level 32a, str. III <sub>f</sub> 1, fea. 18-5    | single wood            | 6890 ± 20  | 7785 – 7673 | 7785 – 7673 | 99.9  | 99.9 |

*Boundary Early-Middle Marcala transition*

7650 – 7522 99.7

### Middle Marcala (III<sub>e</sub>-III<sub>d</sub>)

|               |          |      |                                                                 |                     |           |             |             |       |      |
|---------------|----------|------|-----------------------------------------------------------------|---------------------|-----------|-------------|-------------|-------|------|
| UCIAMS-120928 | PSU-5391 | EG57 | Unit 6, level 21, stratum III <sub>e</sub>                      | <i>Spondias</i> sp. | 6720 ± 20 | 7618 – 7521 | 7607 – 7514 | 83.3  | 99.8 |
| UCIAMS-108403 | PSU-5066 | EG37 | Unit 19, level 29, stratum III <sub>e</sub> , fea. 19-2 and 6-3 | single wood         | 6665 ± 20 | 7580 – 7503 | 7579 – 7501 | 100.6 | 99.9 |
| Beta-156247   | ---      | S08  | Unit 18, level 27, stratum III <sub>d</sub> 3, fea. 3           | charcoal            | 6630 ± 60 | 7591 – 7428 | 7578 – 7437 | 105.4 | 99.9 |
| UCIAMS-108402 | PSU-5065 | EG36 | Unit 19, level 26, str. III <sub>e</sub> , fea. 19-2            | single twig         | 6630 ± 20 | 7569 – 7475 | 7568 – 7475 | 99.0  | 99.9 |
| UCIAMS-108391 | PSU-5054 | EG21 | Unit 2, level 18b, stratum III, fea. 3                          | single wood         | 6620 ± 20 | 7567 – 7465 | 7565 – 7466 | 99.9  | 99.9 |
| UCIAMS-90926  | PSU-4725 | EG02 | Unit 2, level 17a, stratum III <sub>e</sub> , fea. 3            | <i>Spondias</i> sp. | 6600 ± 25 | 7564 – 7435 | 7563 – 7437 | 102.3 | 99.9 |
| UCIAMS-108401 | PSU-5064 | EG35 | Unit 19, level 25, stratum III <sub>e</sub>                     | single twig         | 6585 ± 20 | 7557 – 7433 | 7556 – 7435 | 101.9 | 99.9 |
| UCIAMS-112163 | PSU-5189 | EG47 | Unit 6, level 20, stratum III <sub>e</sub>                      | quid (single fiber) | 6580 ± 20 | 7555 – 7432 | 7554 – 7434 | 101.0 | 99.9 |

| Lab no.       | PSU no.  | Sample ID | Provenience                               | Sample material     | <sup>14</sup> C BP | Unmodeled (BP; 2σ) | Modeled (BP; 2σ) | A    | C    |
|---------------|----------|-----------|-------------------------------------------|---------------------|--------------------|--------------------|------------------|------|------|
| UCIAMS-90930  | PSU-4729 | EG07      | Unit 6, level 25, stratum IIIf            | <i>Spondias</i> sp. | 6545 ± 20          | 7483 – 7425        | 7488 – 7427      | 92.6 | 99.9 |
| UCIAMS-107522 | PSU-5026 | EG31      | Unit 18, level 27, stratum IIIf, fea. 2-2 | leaf                | 6540 ± 20          | 7480 – 7424        | 7485 – 7426      | 89.9 | 99.9 |

*Boundary End Middle Marcala*

7471 – 7376 99.4

*Boundary Start Late Marcala*

4389 – 4245 99.4

### Late Marcala (IIc-IIa)

|               |          |      |                                |                               |           |             |             |       |      |
|---------------|----------|------|--------------------------------|-------------------------------|-----------|-------------|-------------|-------|------|
| UCIAMS-108397 | PSU-5060 | EG30 | Unit 18, level 19, stratum II  | single wood                   | 3880 ± 20 | 4409 – 4246 | 4344 – 4162 | 84.8  | 99.9 |
| UCIAMS-128441 | PSU-5630 | EG70 | Unit 7, level 9, stratum IIc   | <i>Zea mays</i> cob           | 3870 ± 15 | 4407 – 4240 | 4344 – 4163 | 109.0 | 99.9 |
| UCIAMS-117705 | PSU-5355 | EG54 | Unit 6, level 20, stratum IIa7 | <i>tree legume</i>            | 3855 ± 15 | 4406 – 4160 | 4337 – 4158 | 113.3 | 99.9 |
| UCIAMS-128444 | PSU-5633 | EG73 | Unit 18, level 18, stratum IIc | <i>Zea mays</i> cob (charred) | 3830 ± 15 | 4288 – 4154 | 4284 – 4154 | 103.8 | 99.9 |
| UCIAMS-107519 | PSU-5023 | EG22 | Unit 3, level 14, stratum II   | single wood                   | 3825 ± 15 | 4285 – 4152 | 4280 – 4152 | 102.3 | 99.9 |
| UCIAMS-127387 | PSU-5605 | EG66 | Unit 6, level 19, stratum IIa  | <i>Zea mays</i> cob           | 3815 ± 20 | 4287 – 4101 | 4282 – 4103 | 102.5 | 99.9 |
| Beta-171703   | ---      | S06  | Unit 18, level 18, stratum IIc | charcoal                      | 3780 ± 60 | 4405 – 3981 | 4292 – 4077 | 119.7 | 99.9 |
| UCIAMS-127384 | PSU-5602 | EG63 | Unit 19, level 21, stratum IIc | <i>Zea mays</i> cob           | 3780 ± 25 | 4237 – 4088 | 4235 – 4091 | 101.2 | 99.8 |
| UCIAMS-127386 | PSU-5604 | EG65 | Unit 6, level 18, stratum IIa  | <i>Zea mays</i> cob           | 3775 ± 20 | 4233 – 4087 | 4232 – 4089 | 99.0  | 99.8 |
| UCIAMS-130720 | PSU-5693 | EG74 | Unit 19, level 21, stratum IIc | <i>Zea mays</i> cob           | 3765 ± 25 | 4235 – 4007 | 4233 – 4085 | 104.2 | 99.8 |
| UCIAMS-130721 | PSU-5694 | EG75 | Unit 19, level 21, stratum IIc | <i>Zea mays</i> cob           | 3745 ± 25 | 4224 – 3988 | 4227 – 4074 | 114.2 | 99.8 |
| UCIAMS-93254  | PSU-4754 | EG14 | Unit 19, level 21, stratum IIc | <i>Zea mays</i> cob           | 3740 ± 20 | 4153 – 3991 | 4220 – 4075 | 116.6 | 99.8 |
| UCIAMS-130722 | PSU-5695 | EG76 | Unit 19, level 21, stratum IIc | <i>Zea mays</i> cob           | 3735 ± 25 | 4154 – 3985 | 4224 – 4021 | 110.6 | 99.9 |
| UCIAMS-93253  | PSU-4753 | EG12 | Unit 7, level 9, stratum IIc   | <i>Zea mays</i> cob           | 3730 ± 20 | 4150 – 3988 | 4153 – 4021 | 106.6 | 99.9 |

*Boundary End Late Marcala*

4133 – 3994 99.5

*Boundary Start Estanzuela*

4006 – 3249 99.5

### Estanzuela (Middle Formative; IIc-IIa)

|             |     |     |                                              |          |            |             |             |       |      |
|-------------|-----|-----|----------------------------------------------|----------|------------|-------------|-------------|-------|------|
| Beta-171704 | --- | S07 | Unit 18, level 21, stratum Ib2/IIc interface | charcoal | 3100 ± 40  | 3398 – 3185 | 3390 – 3183 | 98.9  | 99.8 |
| Beta-156243 | --- | S05 | Unit 18, level 16, stratum IIc               | charcoal | 3040 ± 220 | 3820 – 2749 | 3560 – 2775 | 109.5 | 99.6 |

| Lab no.                              | PSU no.  | Sample ID | Provenience                    | Sample material        | <sup>14</sup> C BP | Unmodeled (BP; 2σ) | Modeled (BP; 2σ) | A    | C    |
|--------------------------------------|----------|-----------|--------------------------------|------------------------|--------------------|--------------------|------------------|------|------|
| UCIAMS-112161                        | PSU-5187 | EG45      | Unit 6, level 18, stratum IIa6 | avocado seed (charred) | 2755 ± 20          | 2919 – 2784        | 2921 – 2785      | 98.7 | 99.9 |
| <i>Boundary End Middle Formative</i> |          |           |                                |                        |                    |                    | 2865 – 2366      |      | 99.7 |
| <i>Boundary Start Late Formative</i> |          |           |                                |                        |                    |                    | 2396 – 2280      |      | 99.7 |

### Estanzuela (Late Formative; Id-Ia)

|               |          |      |                                                   |                               |           |             |             |       |      |
|---------------|----------|------|---------------------------------------------------|-------------------------------|-----------|-------------|-------------|-------|------|
| Beta-159055   | ---      | S04  | Unit 2, level 14a, str. Ic/IIc interface          | <i>Zea mays</i> cob           | 2280 ± 40 | 2353 – 2157 | 2348 – 2156 | 93.0  | 99.8 |
| UCIAMS-109340 | PSU-5105 | EG39 | Unit 19, level 4, stratum Ib                      | Human Hair                    | 2280 ± 15 | 2347 – 2206 | 2345 – 2186 | 83.8  | 99.8 |
| UCIAMS-173149 | PSU-6945 | EG79 | Unit 1, level 5, stratum Ib                       | <i>Zea mays</i> cob           | 2260 ± 15 | 2340 – 2182 | 2338 – 2181 | 95.5  | 99.9 |
| UCIAMS-128443 | PSU-5632 | EG72 | Unit 18, level 17, stratum IIb2                   | <i>Zea mays</i> cob (charred) | 2250 ± 15 | 2337 – 2161 | 2335 – 2161 | 99.3  | 99.9 |
| UCIAMS-90934  | PSU-4733 | EG11 | Unit 3, level 9, stratum Ib, fea. 2               | <i>Zea mays</i> cob           | 2240 ± 20 | 2333 – 2158 | 2330 – 2158 | 100.8 | 99.9 |
| UCIAMS-90935  | PSU-4734 | EG13 | Unit 18, level 21, stratum Ib2                    | <i>Zea mays</i> cob           | 2240 ± 20 | 2333 – 2158 | 2330 – 2158 | 100.7 | 99.8 |
| UCIAMS-117704 | PSU-5354 | EG53 | Unit 18, level 17, stratum Ib2                    | tree legume                   | 2230 ± 15 | 2322 – 2157 | 2320 – 2157 | 100.6 | 99.9 |
| UCIAMS-173151 | PSU-6947 | EG81 | Unit 1, level 6, stratum Ib                       | <i>Zea mays</i> cob           | 2220 ± 15 | 2314 – 2155 | 2313 – 2155 | 100.3 | 99.9 |
| UCIAMS-128442 | PSU-5631 | EG71 | Unit 18, level 15, stratum Ib                     | <i>Zea mays</i> cob (charred) | 2220 ± 15 | 2314 – 2155 | 2313 – 2155 | 100.3 | 99.9 |
| UCIAMS-173153 | PSU-6949 | EG83 | Unit 2, level 5, stratum Ia/Ib                    | <i>Zea mays</i> cob           | 2215 ± 15 | 2312 – 2154 | 2311 – 2154 | 100.2 | 99.8 |
| UCIAMS-173150 | PSU-6946 | EG80 | Unit 1, level 6, stratum Ib                       | <i>Zea mays</i> cob           | 2215 ± 15 | 2312 – 2154 | 2311 – 2154 | 100.3 | 99.9 |
| UCIAMS-173159 | PSU-6955 | EG89 | Unit 18, level 13b, stratum Ib2                   | <i>Zea mays</i> cob           | 2210 ± 15 | 2310 – 2153 | 2309 – 2153 | 100.2 | 99.9 |
| UCIAMS-173156 | PSU-6952 | EG86 | Unit 3, level 8, stratum Ib                       | <i>Zea mays</i> cob           | 2170 ± 15 | 2302 – 2121 | 2302 – 2121 | 99.4  | 99.8 |
| UCIAMS-173158 | PSU-6954 | EG88 | Unit 18, level 8, stratum Ib                      | <i>Zea mays</i> cob           | 2165 ± 15 | 2301 – 2119 | 2301 – 2118 | 99.6  | 99.8 |
| UCIAMS-173160 | PSU-6956 | EG90 | Unit 18, level 14, stratum Ib2                    | <i>Zea mays</i> cob           | 2165 ± 15 | 2301 – 2119 | 2301 – 2118 | 99.6  | 99.8 |
| UCIAMS-173148 | PSU-6944 | EG78 | Unit 1, level 4, stratum Ia                       | <i>Zea mays</i> cob           | 2155 ± 20 | 2302 – 2064 | 2302 – 2063 | 100.2 | 99.8 |
| UCIAMS-173155 | PSU-6951 | EG85 | Unit 2, level 6, stratum Ib/Ic                    | <i>Zea mays</i> cob           | 2155 ± 15 | 2300 – 2069 | 2300 – 2069 | 100.3 | 99.8 |
| UCIAMS-107521 | PSU-5025 | EG29 | Unit 18, level 13b, stratum Ib2, grass litter-pit | grass                         | 2150 ± 15 | 2299 – 2066 | 2299 – 2066 | 100.6 | 99.8 |
| UCIAMS-173152 | PSU-6948 | EG82 | Unit 2, level 5, stratum Ia/Ib                    | <i>Zea mays</i> cob           | 2135 ± 15 | 2292 – 2057 | 2292 – 2057 | 100.3 | 99.8 |
| Beta-316169   | ---      | ---  | Unit 18, level 13b, stratum Ib2                   | gourd rind                    | 2110 ± 30 | 2282 – 1995 | 2281 – 1995 | 100.1 | 99.7 |

| Lab no.                        | PSU no.  | Sample ID | Provenience                                   | Sample material               | <sup>14</sup> C BP | Unmodeled (BP; 2σ) | Modeled (BP; 2σ) | A     | C    |
|--------------------------------|----------|-----------|-----------------------------------------------|-------------------------------|--------------------|--------------------|------------------|-------|------|
| UCIAMS-112156                  | PSU-5182 | EG40      | Unit 18, level 13b, stratum lb2               | bean (charred)                | 2100 ± 20          | 2129 – 2001        | 2129 – 2001      | 100.0 | 99.8 |
| UCIAMS-112157                  | PSU-5183 | EG41      | Unit 18, level 20, stratum lb                 | bean (charred)                | 2090 ± 20          | 2120 – 1999        | 2120 – 1999      | 100.0 | 99.8 |
| UCIAMS-112159                  | PSU-5185 | EG43      | Unit 18, level 13b, stratum lb2               | squash seed husk              | 2090 ± 20          | 2120 – 1999        | 2120 – 1999      | 100.0 | 99.8 |
| Beta-171701                    | ---      | S03       | Unit 18, level 20, stratum lb2                | <i>Zea mays</i> cob           | 2010 ± 40          | 2103 – 1876        | 2103 – 1876      | 100.4 | 99.7 |
| Beta-156242                    | ---      | S01       | Unit 3, lev. 4 (Unit 1 East profile), str. lb | charcoal                      | 1970 ± 70          | 2114 – 1738        | 2110 – 1825      | 108.5 | 99.7 |
| UCIAMS-93255                   | PSU-4755 | EG15      | Unit 19, level 5, stratum lb, fea. 2          | <i>Zea mays</i> cob           | 1950 ± 15          | 1944 – 1867        | 1943 – 1867      | 101.0 | 99.9 |
| UCIAMS-127388                  | PSU-5606 | EG67      | Unit 16, level 16, stratum ld                 | <i>Zea mays</i> cob (charred) | 1945 ± 20          | 1945 – 1828        | 1946 – 1835      | 102.9 | 99.9 |
| UCIAMS-127389                  | PSU-5607 | EG68      | Unit 16, level 17, str. ld/lld interface      | <i>Zea mays</i> cob (charred) | 1945 ± 20          | 1945 – 1828        | 1946 – 1835      | 103.0 | 99.9 |
| Beta-171702                    | ---      | S02       | Unit 18, level 7, stratum lb, fea. 2          | charcoal                      | 1930 ± 60          | 1998 – 1718        | 2034 – 1817      | 111.5 | 99.7 |
| UCIAMS-128440                  | PSU-5629 | EG69      | Unit 7, level 8, str. ld/lld interface        | <i>Zea mays</i> cob           | 1925 ± 15          | 1919 – 1825        | 1920 – 1829      | 106.2 | 99.9 |
| UCIAMS-173154                  | PSU-6950 | EG84      | Unit 2, level 6, stratum lb/lc                | <i>Zea mays</i> cob           | 1880 ± 15          | 1876 – 1741        | 1877 – 1820      | 108.3 | 99.9 |
| <i>Boundary End Estanzuela</i> |          |           |                                               |                               |                    | 1872 – 1782        |                  | 99.6  |      |
| <i>Boundary Begin Classic</i>  |          |           |                                               |                               |                    | 1752 – 1187        |                  | 99.5  |      |
| <b>Classic Period (1a)</b>     |          |           |                                               |                               |                    |                    |                  |       |      |
| UCIAMS-173147                  | PSU-6943 | EG77      | Unit 1, level 3, stratum 1a                   | <i>Zea mays</i> cob           | 1285 ± 15          | 1278 – 1182        | 1277 – 1182      | 101.5 | 99.9 |
| UCIAMS-90938                   | PSU-4737 | EG18      | Unit 13, level 8c, stratum lb, fea. 2         | deer hair                     | 1150 ± 20          | 1173 – 981         | 1175 – 985       | 87.7  | 99.8 |
| <i>Boundary Model End</i>      |          |           |                                               |                               |                    |                    | 1173 – 407       |       | 98.3 |

**Fig. S3.** OxCal graphical output.

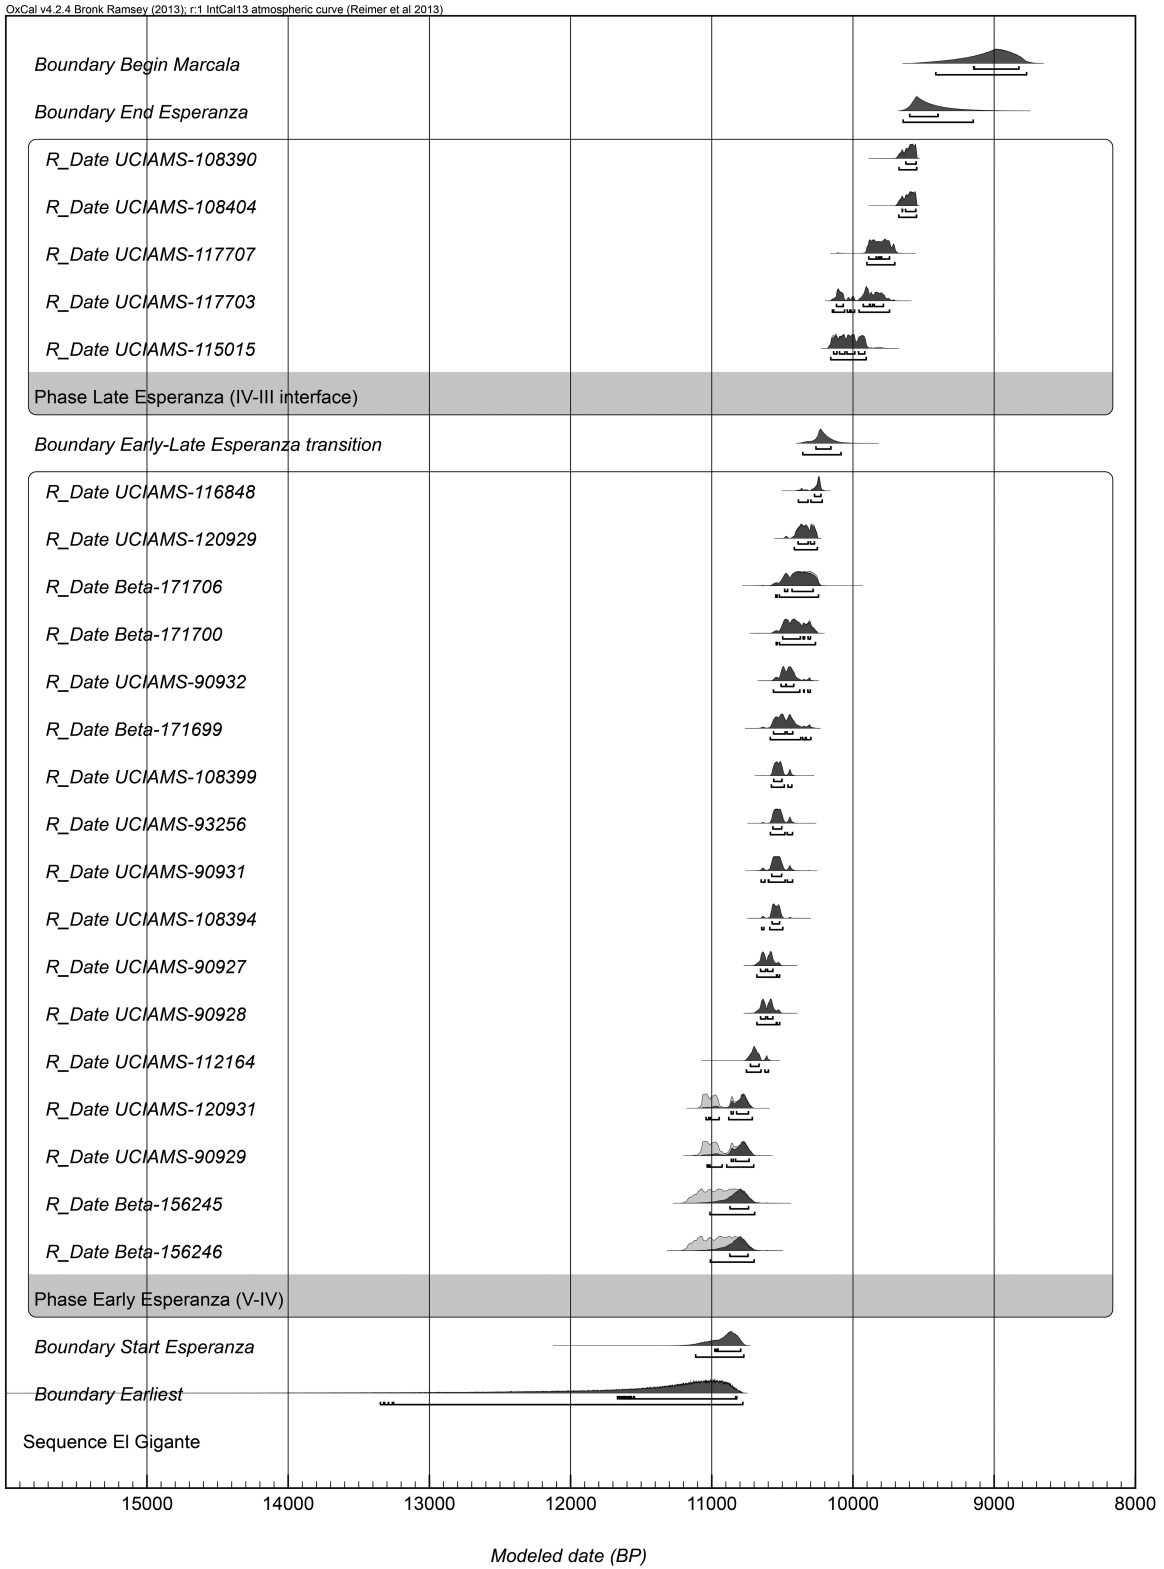



**Fig. S3. (continued)**

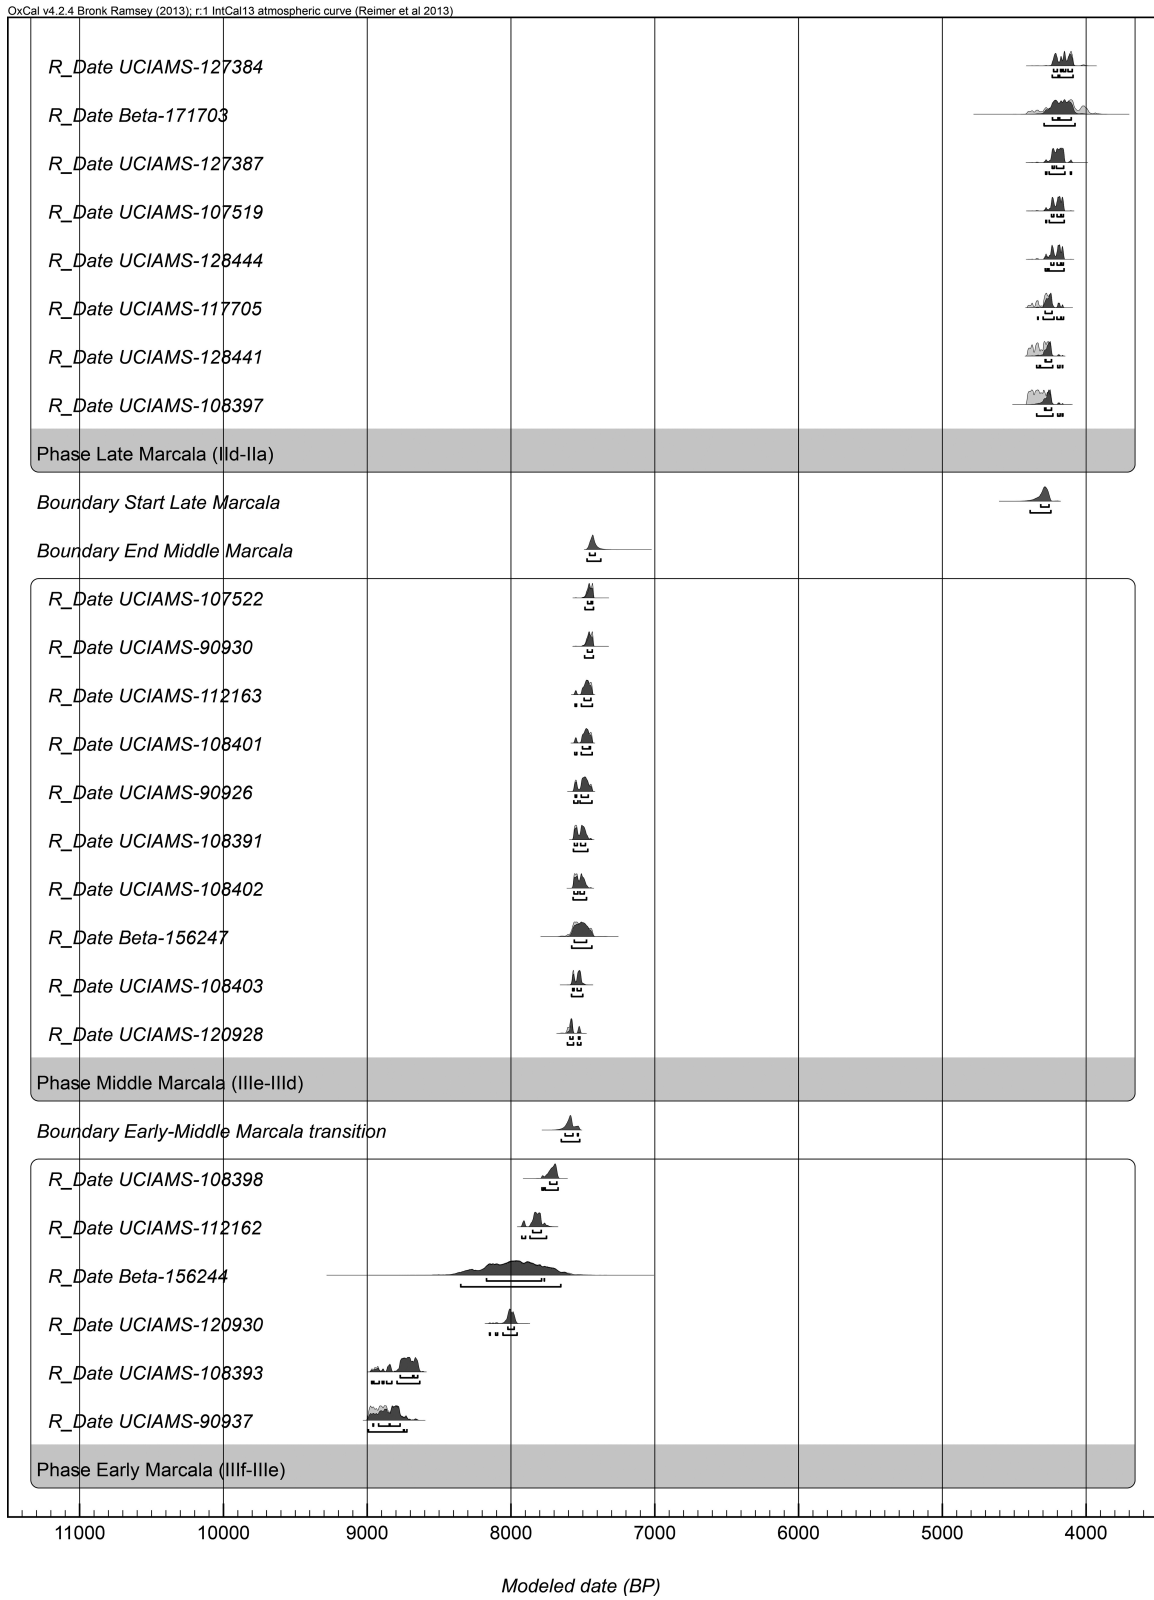

**Fig. S3. (continued)**

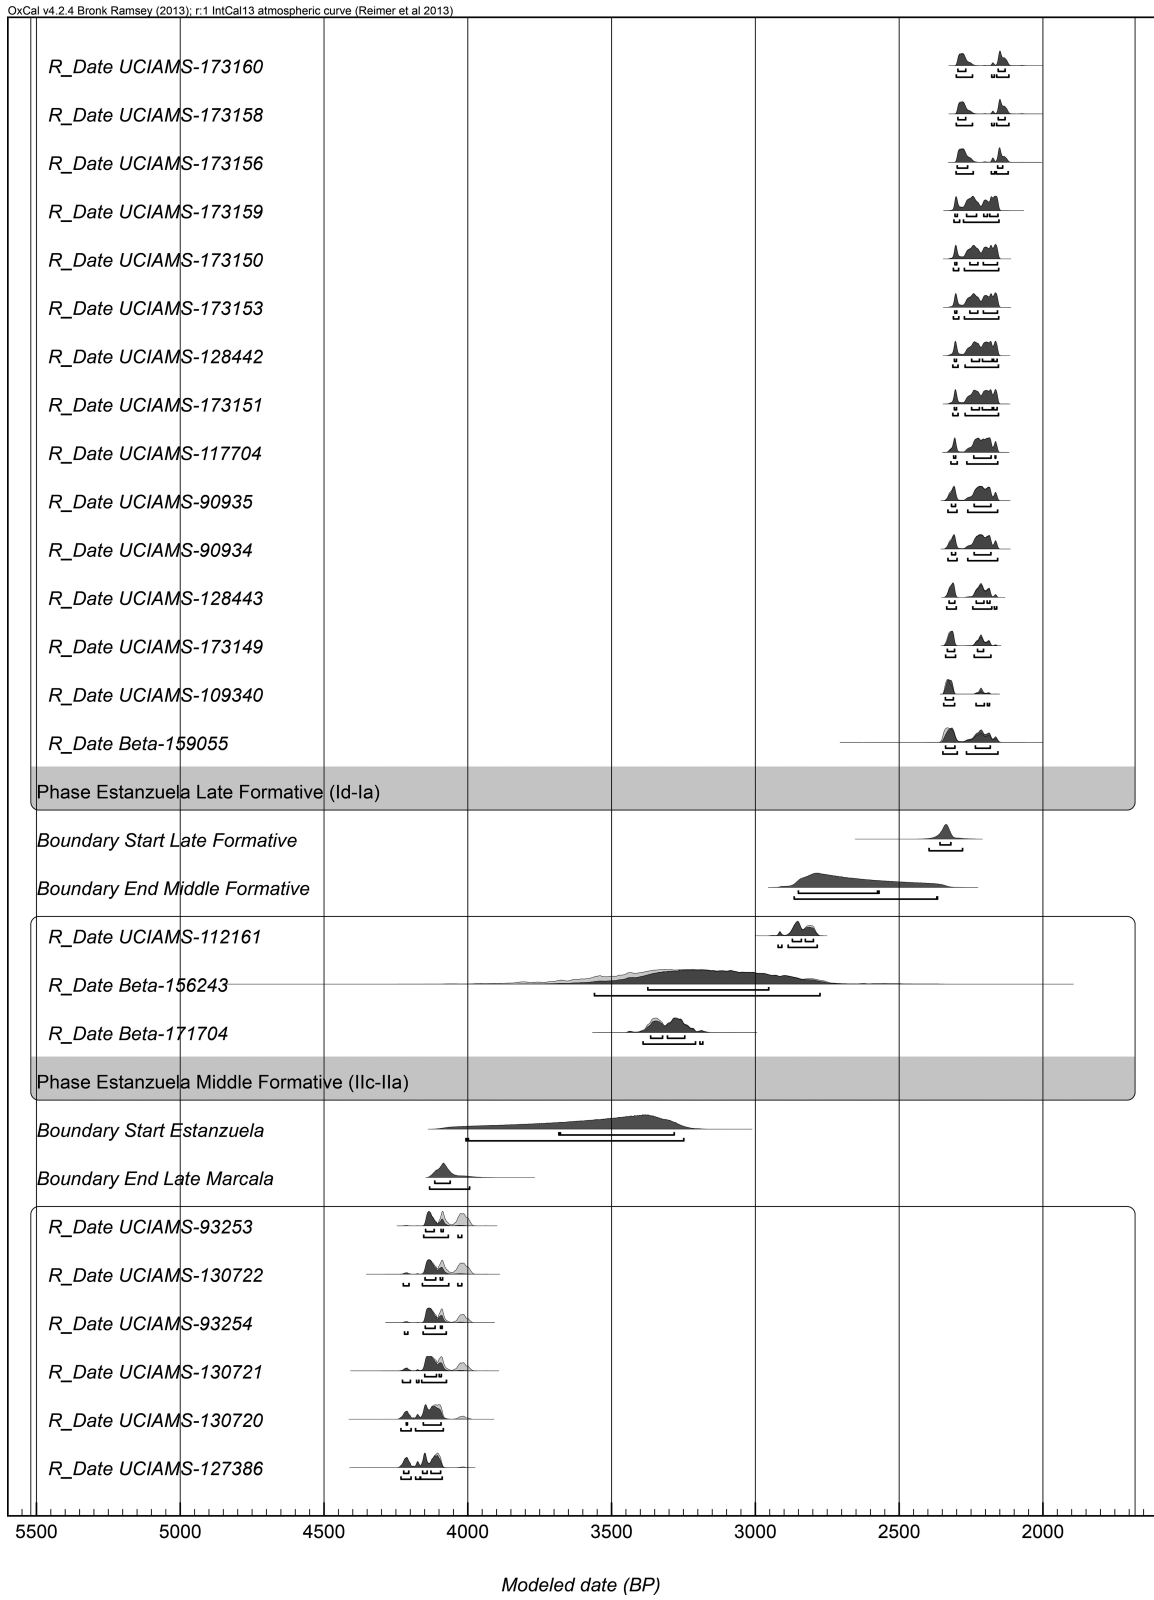

**Fig. S3. (continued)**

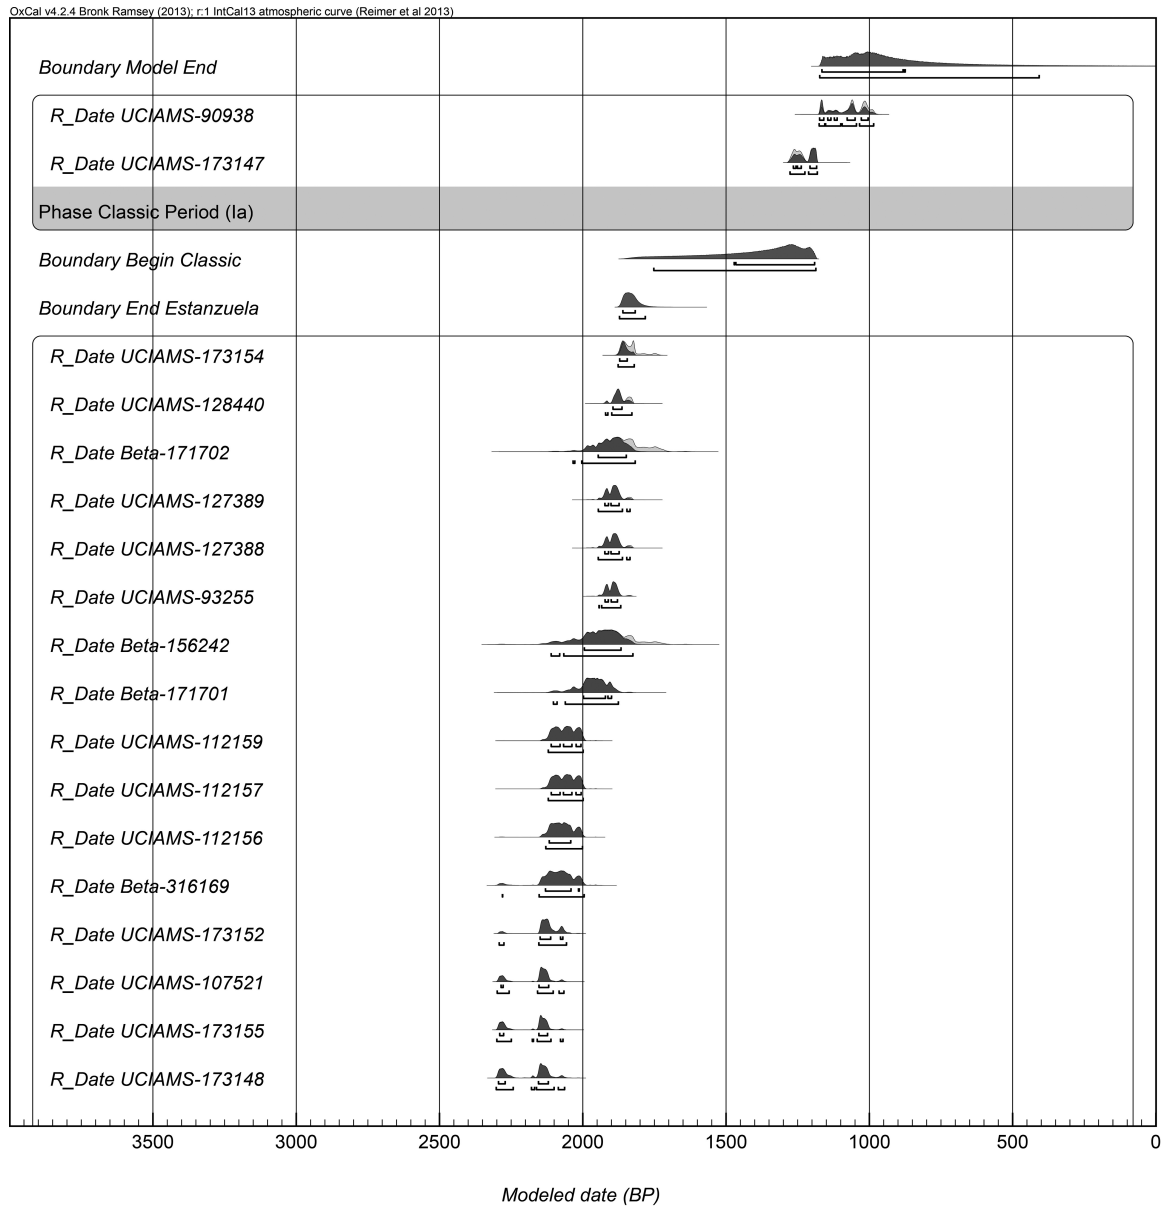

## Model CQL2 code

```
Options()
{
  Resolution=1;
  BCAD=FALSE;
  PlusMinus=FALSE;
  SD1=FALSE;
  SD2=TRUE;
  SD3=FALSE;
};
Plot()
{
  Sequence("El Gigante")
  {
    Boundary("Earliest");
    Boundary("Start Esperanza");
    Phase("Early Esperanza (V-IV)")
    {
      R_Date("Beta-156246", 9600, 60);
      R_Date("Beta-156245", 9590, 60);
      R_Date("UCIAMS-90929", 9550, 35);
      R_Date("UCIAMS-120931", 9550, 25);
      R_Date("UCIAMS-112164", 9455, 20);
      R_Date("UCIAMS-90928", 9375, 25);
      R_Date("UCIAMS-90927", 9375, 25);
      R_Date("UCIAMS-108394", 9335, 20);
      R_Date("UCIAMS-90931", 9325, 30);
      R_Date("UCIAMS-93256", 9315, 25);
      R_Date("UCIAMS-108399", 9310, 20);
      R_Date("Beta-171699", 9290, 40);
      R_Date("UCIAMS-90932", 9270, 25);
      R_Date("Beta-171700", 9240, 40);
      R_Date("Beta-171706", 9210, 60);
      R_Date("UCIAMS-120929", 9190, 20);
      R_Date("UCIAMS-116848", 9105, 30);
    };
    Boundary("Early-Late Esperanza transition");
    Phase("Late Esperanza (IV-III interface)")
    {
      R_Date("UCIAMS-115015", 8880, 25);
      R_Date("UCIAMS-117703", 8835, 25);
      R_Date("UCIAMS-117707", 8790, 20);
      R_Date("UCIAMS-108404", 8670, 20);
      R_Date("UCIAMS-108390", 8665, 20);
    };
    Boundary("End Esperanza");
    Boundary("Begin Marcala");
    Phase("Early Marcala (IIIIf-IIIe)")
    {
      R_Date("UCIAMS-90937", 7985, 25);
      R_Date("UCIAMS-108393", 7925, 20);
    }
  }
}
```

```

R_Date("UCIAMS-120930", 7205, 25);
R_Date("Beta-156244", 7140, 200);
R_Date("UCIAMS-112162", 6985, 20);
R_Date("UCIAMS-108398", 6890, 20);
};
Boundary("Early-Middle Marcala transition");
Phase("Middle Marcala (IIIe-IIIId)")
{
  R_Date("UCIAMS-120928", 6720, 20);
  R_Date("UCIAMS-108403", 6665, 20);
  R_Date("Beta-156247", 6630, 60);
  R_Date("UCIAMS-108402", 6630, 20);
  R_Date("UCIAMS-108391", 6620, 20);
  R_Date("UCIAMS-90926", 6600, 25);
  R_Date("UCIAMS-108401", 6585, 20);
  R_Date("UCIAMS-112163", 6580, 20);
  R_Date("UCIAMS-90930", 6545, 20);
  R_Date("UCIAMS-107522", 6540, 20);
};
Boundary("End Middle Marcala");
Boundary("Start Late Marcala");
Phase("Late Marcala (IIId-IIa)")
{
  R_Date("UCIAMS-108397", 3880, 20);
  R_Date("UCIAMS-128441", 3870, 15);
  R_Date("UCIAMS-117705", 3855, 15);
  R_Date("UCIAMS-128444", 3830, 15);
  R_Date("UCIAMS-107519", 3825, 15);
  R_Date("UCIAMS-127387", 3815, 20);
  R_Date("Beta-171703", 3780, 60);
  R_Date("UCIAMS-127384", 3780, 25);
  R_Date("UCIAMS-127386", 3775, 20);
  R_Date("UCIAMS-130720", 3765, 25);
  R_Date("UCIAMS-130721", 3745, 25);
  R_Date("UCIAMS-93254", 3740, 20);
  R_Date("UCIAMS-130722", 3735, 25);
  R_Date("UCIAMS-93253", 3730, 20);
};
Boundary("End Late Marcala");
Boundary("Start Estanzuela");
Phase("Estanzuela Middle Formative (IIc-IIa)")
{
  R_Date("Beta-171704", 3100, 40);
  R_Date("Beta-156243", 3040, 220);
  R_Date("UCIAMS-112161", 2755, 20);
};
Boundary("End Middle Formative");
Boundary("Start Late Formative");
Phase("Estanzuela Late Formative (Id-Ia)")
{
  R_Date("Beta-159055", 2280, 40);
  R_Date("UCIAMS-109340", 2280, 15);
  R_Date("UCIAMS-173149", 2260, 15);
};

```

```

R_Date("UCIAMS-128443", 2250, 15);
R_Date("UCIAMS-90934", 2240, 20);
R_Date("UCIAMS-90935", 2240, 20);
R_Date("UCIAMS-117704", 2230, 15);
R_Date("UCIAMS-173151", 2220, 15);
R_Date("UCIAMS-128442", 2220, 15);
R_Date("UCIAMS-173153", 2215, 15);
R_Date("UCIAMS-173150", 2215, 15);
R_Date("UCIAMS-173159", 2210, 15);
R_Date("UCIAMS-173156", 2170, 15);
R_Date("UCIAMS-173158", 2165, 15);
R_Date("UCIAMS-173160", 2165, 15);
R_Date("UCIAMS-173148", 2155, 20);
R_Date("UCIAMS-173155", 2155, 15);
R_Date("UCIAMS-107521", 2150, 15);
R_Date("UCIAMS-173152", 2135, 15);
R_Date("Beta-316169", 2110, 30);
R_Date("UCIAMS-112156", 2100, 20);
R_Date("UCIAMS-112157", 2090, 20);
R_Date("UCIAMS-112159", 2090, 20);
R_Date("Beta-171701", 2010, 40);
R_Date("Beta-156242", 1970, 70);
R_Date("UCIAMS-93255", 1950, 15);
R_Date("UCIAMS-127388", 1945, 20);
R_Date("UCIAMS-127389", 1945, 20);
R_Date("Beta-171702", 1930, 60);
R_Date("UCIAMS-128440", 1925, 15);
R_Date("UCIAMS-173154", 1880, 15);
};
Boundary("End Estanzuela");
Boundary("Begin Classic");
Phase("Classic Period (Ia)")
{
  R_Date("UCIAMS-173147", 1285, 15);
  R_Date("UCIAMS-90938", 1150, 20);
};
Boundary("Model End");
};
};

```

**Table S3.** Dates omitted from the chronological model.

| Lab no.       | PSU no.  | Sample ID | Provenience                                       | Sample material        | 14C BP           | Cal BP (2 $\sigma$ ) | Reason for omission                                                                 |
|---------------|----------|-----------|---------------------------------------------------|------------------------|------------------|----------------------|-------------------------------------------------------------------------------------|
| Beta-?        | ---      | S16       | Unknown, stratum IX?                              | charcoal               | 39820 $\pm$ 1100 | 45720 – 42110        | Hasemann sample; lack of provenience                                                |
| UCIAMS-112160 | PSU-5186 | EG44      | Unit 17, level 32, stratum VIIa                   | ceiba seed (charred)   | 26420 $\pm$ 300  | 31117 – 29926        | Stratum VII is a pre-human occupation level                                         |
| ISGS 2966-3   | ---      | S18       | Unknown, strata IV-VI                             | charcoal               | 9970 $\pm$ 70    | 11745 – 11239        | Hasemann sample; lack of provenience                                                |
| UCIAMS-107520 | PSU-5024 | EG28      | Unit 17, level 24, feature 17-3, stratum V        | single wood            | 9630 $\pm$ 25    | 11170 – 10793        | Pit with carbon, likely mixed; sample provenience uncertain                         |
| ISGS 2965-2   | ---      | S17       | Unknown, strata IV-VI                             | charcoal               | 9450 $\pm$ 70    | 11076 – 10510        | Hasemann sample; lack of provenience                                                |
| UCIAMS-90925  | PSU-4724 | EG01      | Unit 1, level 18, feature 5, stratum Va           | Persea sp.             | 8880 $\pm$ 30    | 10172 – 9897         | Date consistent with Esperanza, but context mixed                                   |
| UCIAMS-108400 | PSU-5063 | EG34      | Unit 19, level 16, feature 8, str. IIa            | single wood            | 6435 $\pm$ 20    | 7422 – 7318          | Date too early for stratum II, feature possibly intrudes into stratum III           |
| UCIAMS-116849 | PSU-5329 | EG51      | Unit 2, level 16a, stratum III                    | P-seed                 | 6375 $\pm$ 25    | 7415 – 7257          | Poor model agreement (A<60%), not representative of stratigraphic position          |
| Beta-171705   | ---      | S10       | Unit 19, level 31, intrusive pit, stratum IIIe    | charcoal               | 6180 $\pm$ 90    | 7275 – 6800          | Uncertain stratigraphic assignment due to pit feature, poor model agreement (A<60%) |
| UCIAMS-90933  | PSU-4732 | EG10      | Unit 1, level 11, feature 4, stratum IIIId        | Zea mays cob           | 3825 $\pm$ 20    | 4295 – 4148          | Level disturbed by looting of Classic period occupation                             |
| UCIAMS-117706 | PSU-5356 | EG55      | Unit 3, level 19, stratum IIIIf2                  | P-seed                 | 3745 $\pm$ 15    | 4153 – 4000          | Level disturbed by looting of Classic period occupation                             |
| UCIAMS-120932 | PSU-5395 | EG61      | Unit 17, level 25, stratum V                      | P-seed                 | 3740 $\pm$ 15    | 4151 – 3999          | Too late for stratum V, Late Formative disturbance intrudes into this level         |
| UCIAMS-127385 | PSU-5603 | EG64      | Unit 19, level 21, stratum IIc                    | Zea mays cob (charred) | 2270 $\pm$ 20    | 2346 – 2182          | Situated in intrusive charcoal concentration, may be contaminated                   |
| UCIAMS-108395 | PSU-5058 | EG26      | Unit 10, level 2, stratum Ia, looting disturbance | textile, painted       | 2255 $\pm$ 25    | 2344 – 2158          | Level disturbed by looting of Classic period occupation                             |

| Lab no.       | PSU no.  | Sample ID | Provenience                                    | Sample material        | 14C BP    | Cal BP (2σ) | Reason for omission                                                                                                                           |
|---------------|----------|-----------|------------------------------------------------|------------------------|-----------|-------------|-----------------------------------------------------------------------------------------------------------------------------------------------|
| UCIAMS-108396 | PSU-5059 | EG27      | Unit 13, level 10/11, stratum Ia               | petate-grass           | 2220 ± 20 | 2319 – 2153 | Level disturbed by looting of Classic period occupation                                                                                       |
| UCIAMS-127383 | PSU-5601 | EG62      | Unit 1, level 12, stratum III                  | Zea mays cob (charred) | 2175 ± 20 | 2306 – 2120 | Level disturbed by looting of Classic period occupation                                                                                       |
| UCIAMS-112158 | PSU-5184 | EG42      | Unit 10, level 16, stratum II/III-IV interface | squash seed husk       | 2020 ± 20 | 2037 – 1900 | Level disturbed by looting of Classic period occupation                                                                                       |
| UCIAMS-90936  | PSU-4735 | EG16      | Unit 6, level 28, stratum IVa                  | quid                   | 1950 ± 20 | 1948 – 1830 | Date too early for stratum; probably contamination from upper profile                                                                         |
| UCIAMS-173157 | PSU-6953 | EG87      | Unit 18, level 3, stratum Ib                   | Zea mays cob           | 1775 ± 15 | 1733 – 1619 | Poor model agreement (A<60%); may represent ephemeral Terminal Formative/Early Classic occupation, but date is not corroborated in this study |
| UCIAMS-108392 | PSU-5055 | EG23      | Unit 4, level 15, stratum IVb                  | single wood            | 1685 ± 15 | 1683 – 1547 | Sample context mixed with looting disturbance                                                                                                 |



**Fig. S4.** The effect of the Hallstatt Plateau on dating the Middle-Late Formative transition. The bottom sum probability distribution is created from 151 hypothetical dates generated at 20-yr intervals from 4000–1000 B.P. Calibration curve plateaus have a constraining effect on  $^{14}\text{C}$  probability distributions, as illustrated by the prominent spikes on either side.

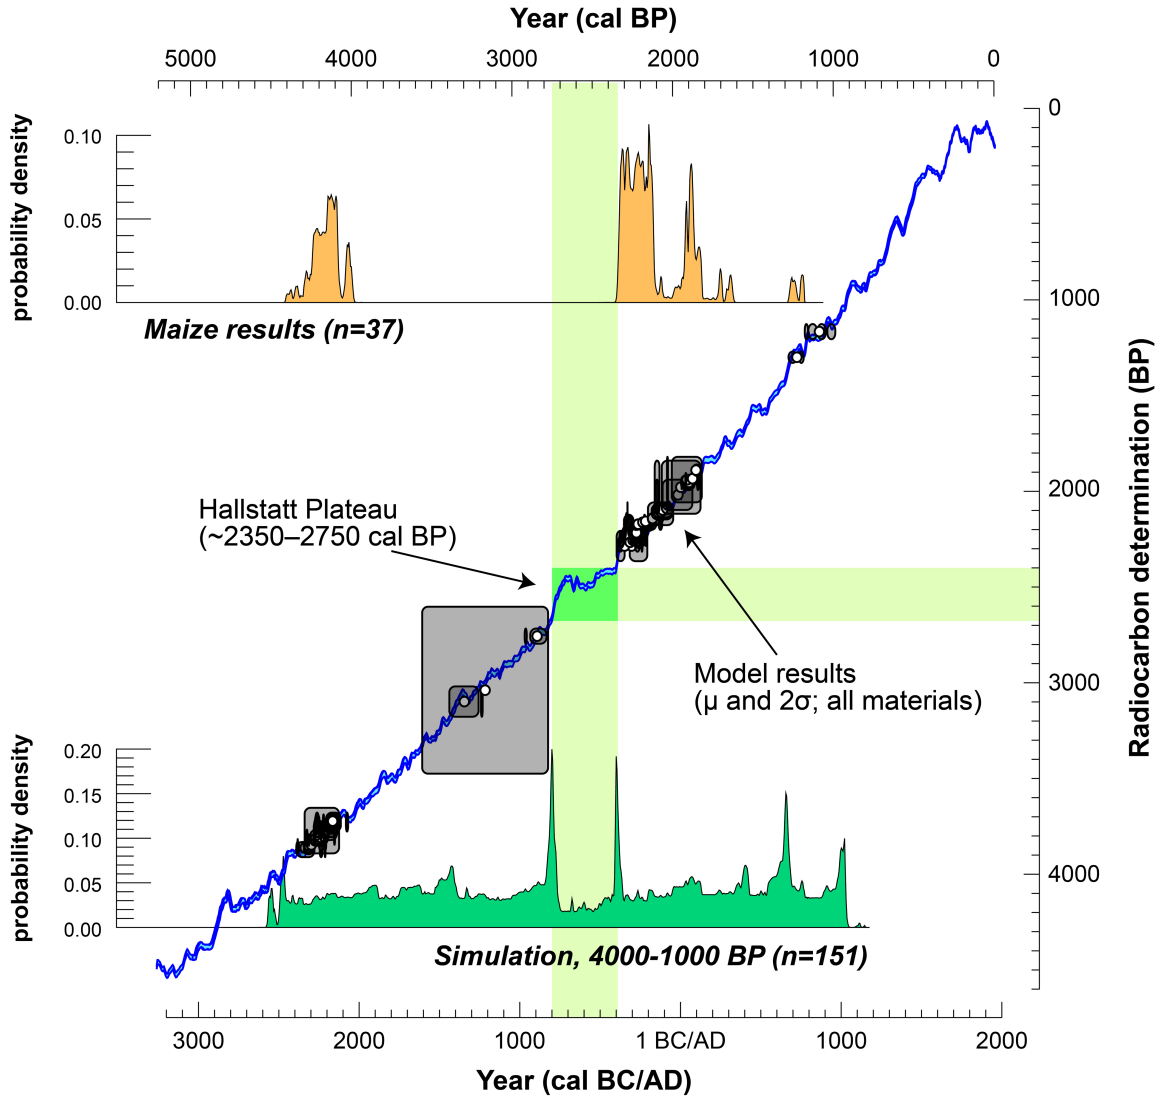

**Table S4.** Principal component analysis of El Gigante maize specimens.

## a. Component matrix

| Variable              | Component 1 | Component 2 | Component 3 |
|-----------------------|-------------|-------------|-------------|
| Row number            | 0.102       | -0.872      | 0.219       |
| Rachis diameter       | 0.706       | -0.579      | 0.257       |
| Rachis segment length | 0.659       | 0.453       | -0.116      |
| Cupule width          | 0.839       | 0.248       | -0.289      |
| Cupule length         | 0.151       | 0.650       | 0.416       |
| Cupule depth          | 0.046       | 0.287       | 0.856       |
| Cupule wing width     | 0.775       | 0.235       | -0.082      |
| Cob diameter          | 0.842       | -0.359      | 0.091       |

## b. Total variance explained

| Component | Initial Eigenvalues |               |              |
|-----------|---------------------|---------------|--------------|
|           | Total               | % of variance | Cumulative % |
| 1         | 2.982               | 37.276        | 37.276       |
| 2         | 2.053               | 25.662        | 62.938       |
| 3         | 1.131               | 14.137        | 77.075       |
| 4         | 0.656               | 8.197         | 85.273       |
| 5         | 0.467               | 5.834         | 91.107       |
| 6         | 0.429               | 5.367         | 96.474       |
| 7         | 0.168               | 2.106         | 98.579       |
| 8         | 0.114               | 1.421         | 100          |

## c. Communalities

| Variable              | Initial | Extraction |
|-----------------------|---------|------------|
| Row number            | 1       | 0.818      |
| Rachis diameter       | 1       | 0.901      |
| Rachis segment length | 1       | 0.653      |
| Cupule width          | 1       | 0.849      |
| Cupule length         | 1       | 0.618      |
| Cupule depth          | 1       | 0.817      |
| Cupule wing width     | 1       | 0.663      |
| Cob diameter          | 1       | 0.846      |

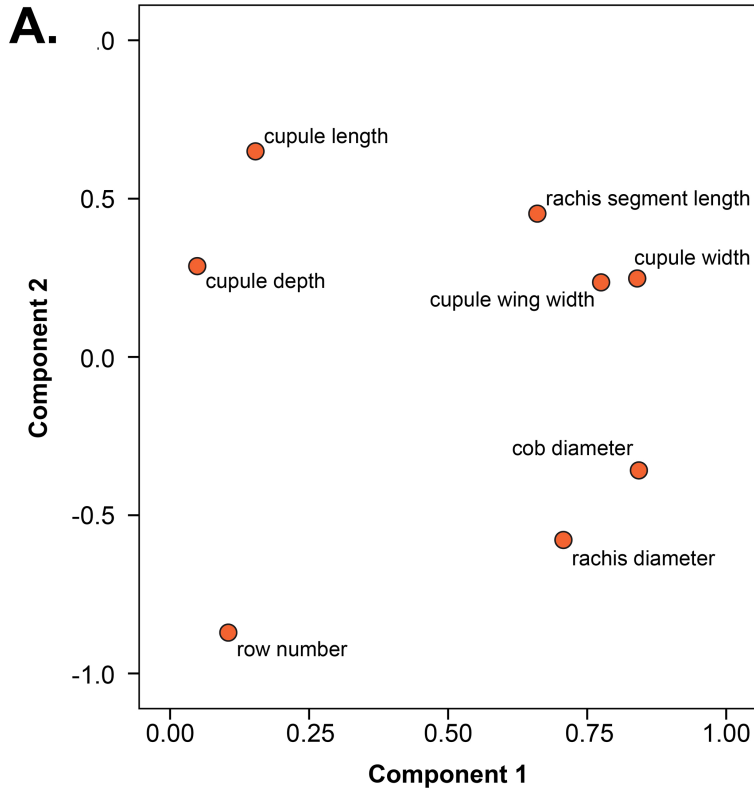

**Fig. S5.** Results of a principal component analysis examining eight morphological variables. A – plot of variables by component, summarizing the relationship between measured characteristics; B – factor loadings plot, illustrating patterning based on individual sample scores.

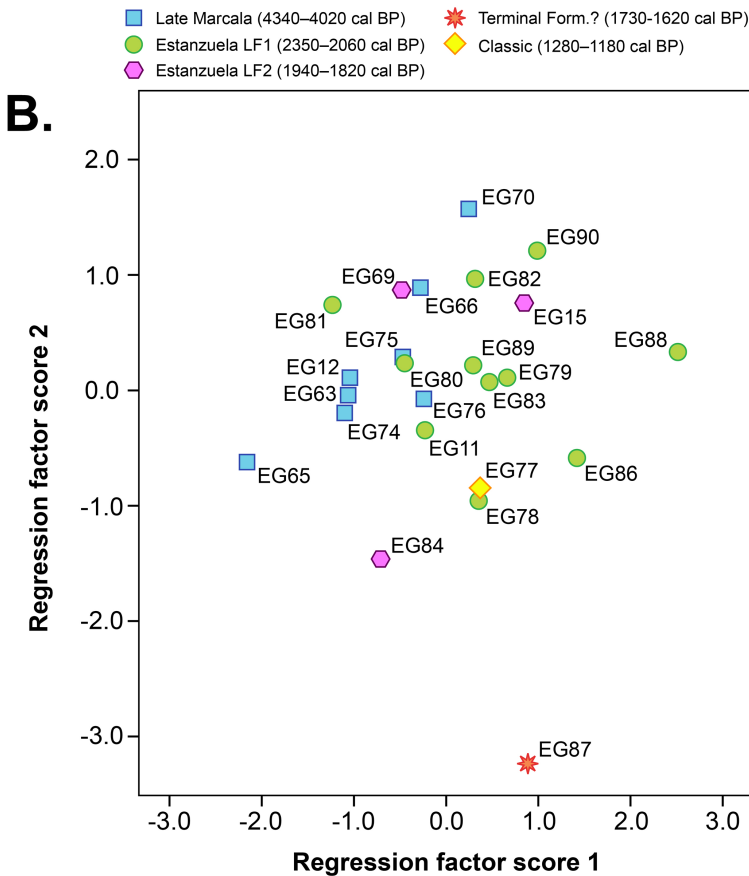

**Table S5.** Comparison of El Gigante and El Riego maize assemblages.

|                                                                         | Row # | Rachis diam. | Rachis seg. length | Cupule width | Cupule length | Cupule depth | Cupule shape index | Cupule wing width | Cob diam | Rachis/cob index |
|-------------------------------------------------------------------------|-------|--------------|--------------------|--------------|---------------|--------------|--------------------|-------------------|----------|------------------|
| <b>El Gigante – Late Marcala (4340–4020 cal BP)</b>                     |       |              |                    |              |               |              |                    |                   |          |                  |
| $\mu$                                                                   | 13.33 | 9.31         | 3.66               | 4.02         | 1.68          | 1.19         | 0.42               | 0.99              | 13.95    | 0.68             |
| $\sigma$                                                                | 1.00  | 1.10         | 0.49               | 0.57         | 0.39          | 0.30         | 0.12               | 0.24              | 2.84     | 0.12             |
| $\sigma^2$                                                              | 1.00  | 1.20         | 0.24               | 0.32         | 0.15          | 0.09         | 0.01               | 0.06              | 8.05     | 0.02             |
| n                                                                       | 9     | 9            | 9                  | 9            | 9             | 9            | 9                  | 9                 | 8        | 8                |
| <b>El Riego – Late Archaic (~4250 cal BP)</b>                           |       |              |                    |              |               |              |                    |                   |          |                  |
| (n=1)                                                                   | ---   | 6.41         | 3.20               | 3.47         | ---           | ---          | ---                | ---               | ---      | ---              |
| <b>El Riego – Early Formative (~3650–3530 cal BP)</b>                   |       |              |                    |              |               |              |                    |                   |          |                  |
| $\mu$                                                                   | ---   | 6.61         | 3.13               | 3.62         | ---           | ---          | ---                | ---               | ---      | ---              |
| $\sigma$                                                                | ---   | 0.68         | 0.20               | 0.61         | ---           | ---          | ---                | ---               | ---      | ---              |
| $\sigma^2$                                                              | ---   | 0.46         | 0.04               | 0.38         | ---           | ---          | ---                | ---               | ---      | ---              |
| n                                                                       | ---   | 2            | 2                  | 2            | ---           | ---          | ---                | ---               | ---      | ---              |
| <b>El Gigante – Estanzuela Late Formative (2350–1820 cal BP)</b>        |       |              |                    |              |               |              |                    |                   |          |                  |
| $\mu$                                                                   | 13.20 | 10.23        | 3.91               | 5.08         | 1.67          | 0.92         | 0.31               | 1.32              | 17.14    | 0.60             |
| $\sigma$                                                                | 1.66  | 1.88         | 0.59               | 0.78         | 0.28          | 0.23         | 0.11               | 0.31              | 3.00     | 0.07             |
| $\sigma^2$                                                              | 2.74  | 3.52         | 0.34               | 0.61         | 0.08          | 0.05         | 0.01               | 0.10              | 9.01     | 0.01             |
| n                                                                       | 15    | 15           | 15                 | 15           | 14            | 15           | 15                 | 15                | 15       | 15               |
| <b>El Riego – Late Formative (~2290–1800 cal BP)</b>                    |       |              |                    |              |               |              |                    |                   |          |                  |
| $\mu$                                                                   | ---   | 8.80         | 3.26               | 4.77         | ---           | ---          | ---                | ---               | ---      | ---              |
| $\sigma$                                                                | ---   | 2.19         | 0.45               | 0.90         | ---           | ---          | ---                | ---               | ---      | ---              |
| $\sigma^2$                                                              | ---   | 4.80         | 0.21               | 0.80         | ---           | ---          | ---                | ---               | ---      | ---              |
| n                                                                       | ---   | 4            | 4                  | 4            | ---           | ---          | ---                | ---               | ---      | ---              |
| <b>El Gigante – Terminal Formative/Early Classic (1730–1620 cal BP)</b> |       |              |                    |              |               |              |                    |                   |          |                  |
| (n=1)                                                                   | 22    | 16.33        | 3.52               | 4.60         | 1.22          | 1.00         | 0.27               | 0.95              | 22.91    | 0.71             |
| <b>El Riego – Early Classic (~1720–1410 cal BP)</b>                     |       |              |                    |              |               |              |                    |                   |          |                  |
| $\mu$                                                                   | ---   | 8.15         | 3.36               | 4.50         | ---           | ---          | ---                | ---               | ---      | ---              |
| $\sigma$                                                                | ---   | 1.01         | 0.40               | 0.94         | ---           | ---          | ---                | ---               | ---      | ---              |
| $\sigma^2$                                                              | ---   | 1.02         | 0.16               | 0.89         | ---           | ---          | ---                | ---               | ---      | ---              |
| n                                                                       | ---   | 10           | 10                 | 10           | ---           | ---          | ---                | ---               | ---      | ---              |
| <b>El Gigante – Late Classic (1280–1180 cal BP)</b>                     |       |              |                    |              |               |              |                    |                   |          |                  |
| (n=1)                                                                   | 16    | 13.59        | 3.51               | 4.44         | 1.94          | 1.00         | 0.44               | 1.13              | 18.63    | 0.73             |
| <b>El Riego – Postclassic (~930–380 cal BP)</b>                         |       |              |                    |              |               |              |                    |                   |          |                  |
| $\mu$                                                                   | ---   | 8.62         | 3.02               | 5.78         | ---           | ---          | ---                | ---               | ---      | ---              |
| $\sigma$                                                                | ---   | 4.39         | 0.42               | 2.00         | ---           | ---          | ---                | ---               | ---      | ---              |
| $\sigma^2$                                                              | ---   | 19.28        | 0.17               | 4.00         | ---           | ---          | ---                | ---               | ---      | ---              |
| n                                                                       | ---   | 3            | 3                  | 3            | ---           | ---          | ---                | ---               | ---      | ---              |
| <b>El Riego – Historic (~160 cal BP)</b>                                |       |              |                    |              |               |              |                    |                   |          |                  |
| (n=1)                                                                   | ---   | 8.14         | 3.19               | 6.28         | ---           | ---          | ---                | ---               | ---      | ---              |

**Table S6.** El Gigante Maize cob measurements.

| Lab no.        | PSU no.  | Sample ID | Rows | Rachis diameter | Rachis segment length | Cupule width | Cupule length | Cupule depth | Cupule shape index (l/w) | Cupule wing width | Cob diameter | Rachis/cob index | Cupule hairs? | Cob shape | Fasciated? |
|----------------|----------|-----------|------|-----------------|-----------------------|--------------|---------------|--------------|--------------------------|-------------------|--------------|------------------|---------------|-----------|------------|
| UCIAMS-90933   | PSU-4732 | EG10      | 12   | 7.40            | 3.30                  | 4.10         | 1.90          | 1.15         | 0.46                     | 0.60              | ---          | ---              | N             | conical   | N          |
| UCIAMS-128441  | PSU-5630 | EG70      | 12   | 9.00            | 4.20                  | 4.70         | 2.00          | 1.75         | 0.43                     | 1.50              | 14.80        | 0.61             | Y             | lancelot  | Y          |
| UCIAMS-128444* | PSU-5633 | EG73      | 14   | 4.50            | 1.80                  | 2.40         | 1.80          | 0.75         | 0.75                     | 0.70              | 5.80         | 0.78             | N             | conical   | N          |
| UCIAMS-127387  | PSU-5605 | EG66      | 14   | 9.69            | 4.40                  | 4.20         | 2.20          | 1.00         | 0.52                     | 1.10              | 12.48        | 0.78             | N             | lancelot  | N          |
| UCIAMS-127384  | PSU-5602 | EG63      | 14   | 9.17            | 3.00                  | 4.00         | 1.80          | 1.25         | 0.45                     | 0.90              | 14.00        | 0.66             | Y             | lancelot  | N          |
| UCIAMS-127386  | PSU-5604 | EG65      | 14   | 6.60            | 3.10                  | 3.20         | 1.10          | 0.75         | 0.34                     | 0.70              | 10.41        | 0.63             | N             | tapered   | N          |
| UCIAMS-130720  | PSU-5693 | EG74      | 14   | 9.40            | 3.60                  | 3.80         | 1.30          | 1.00         | 0.34                     | 1.10              | 10.00        | 0.94             | N             | conical   | Y          |
| UCIAMS-130721  | PSU-5694 | EG75      | 12   | 9.73            | 3.50                  | 3.90         | 1.80          | 1.25         | 0.46                     | 1.00              | 17.81        | 0.55             | Y             | lancelot  | N          |
| UCIAMS-93254   | PSU-4754 | EG14      | 14   | 10.10           | 3.60                  | 4.50         | 1.50          | 1.50         | 0.33                     | 1.00              | ---          | ---              | Y             | conical   | Y          |
| UCIAMS-130722  | PSU-5695 | EG76      | 12   | 10.21           | 4.10                  | 4.70         | 1.30          | 1.00         | 0.28                     | 0.80              | 17.06        | 0.60             | Y             | tapered   | Y          |
| UCIAMS-93253   | PSU-4753 | EG12      | 14   | 9.93            | 3.40                  | 3.20         | 2.10          | 1.25         | 0.66                     | 0.80              | 15.00        | 0.66             | N             | lancelot  | Y          |
| Beta-159055**  | ---      | S04       | ---  | ---             | ---                   | ---          | ---           | ---          | ---                      | ---               | ---          | ---              | ---           | ---       | ---        |
| UCIAMS-127385* | PSU-5603 | EG64      | 12   | 8.40            | 4.10                  | 5.00         | 2.10          | 1.00         | 0.42                     | 1.10              | ---          | ---              | N             | conical   | N          |
| UCIAMS-173149  | PSU-6945 | EG79      | 12   | 11.25           | 4.02                  | 5.59         | 1.52          | 0.75         | 0.27                     | 1.30              | 18.02        | 0.62             | Y             | tapered   | N          |
| UCIAMS-128443* | PSU-5632 | EG72      | 14   | 7.10            | 3.60                  | 3.20         | 1.90          | 0.75         | 0.59                     | 0.60              | 9.70         | 0.73             | N             | conical   | N          |
| UCIAMS-90934   | PSU-4733 | EG11      | 14   | 9.71            | 4.10                  | 4.00         | 1.40          | 1.00         | 0.35                     | 1.00              | 18.00        | 0.54             | N             | lancelot  | N          |
| UCIAMS-90935   | PSU-4734 | EG13      | ---  | ---             | ---                   | ---          | ---           | ---          | ---                      | ---               | ---          | ---              | ---           | ---       | ---        |
| UCIAMS-173151  | PSU-6947 | EG81      | 12   | 8.03            | 3.68                  | 4.02         | 1.94          | 0.75         | 0.48                     | 0.84              | 11.04        | 0.73             | N             | lancelot  | N          |
| UCIAMS-128442* | PSU-5631 | EG71      | 14   | 9.00            | 4.00                  | 4.70         | 2.10          | 1.00         | 0.45                     | 1.00              | 14.10        | 0.64             | N             | conical   | N          |
| UCIAMS-173153  | PSU-6949 | EG83      | 12   | 11.12           | 3.83                  | 5.29         | 1.33          | 1.00         | 0.25                     | 1.43              | 16.73        | 0.66             | N             | lancelot  | Y          |
| UCIAMS-173150  | PSU-6946 | EG80      | 12   | 9.15            | 3.22                  | 5.26         | 1.47          | 1.00         | 0.28                     | 1.14              | 13.98        | 0.65             | N             | conical   | N          |
| UCIAMS-173159  | PSU-6955 | EG89      | 14   | 10.55           | 3.81                  | 5.16         | 1.63          | 1.50         | 0.32                     | 1.22              | 16.92        | 0.62             | Y             | lancelot  | N          |
| UCIAMS-127383* | PSU-5601 | EG62      | 12   | 7.40            | 4.10                  | 3.60         | 2.30          | 1.00         | 0.64                     | 0.60              | 9.70         | 0.76             | N             | conical   | N          |
| UCIAMS-173156  | PSU-6952 | EG86      | 14   | 13.90           | 4.08                  | 5.87         | 1.41          | 1.00         | 0.24                     | 1.43              | 20.71        | 0.67             | Y             | lancelot  | N          |
| UCIAMS-173158  | PSU-6954 | EG88      | 14   | 13.07           | 4.76                  | 6.26         | 1.79          | 1.00         | 0.29                     | 2.04              | 23.11        | 0.57             | Y             | lancelot  | N          |
| UCIAMS-173160  | PSU-6956 | EG90      | 10   | 11.16           | 4.35                  | 6.19         | 2.13          | 1.00         | 0.34                     | 1.02              | 20.15        | 0.55             | Y             | lancelot  | N          |
| UCIAMS-173148  | PSU-6944 | EG78      | 16   | 11.16           | 3.95                  | 4.86         | 1.46          | 0.50         | 0.30                     | 1.22              | 18.06        | 0.62             | Y             | tapered   | N          |
| UCIAMS-173155  | PSU-6951 | EG85      | 14   | 8.46            | 4.28                  | 3.93         | ---           | 1.00         | 0.00                     | 1.81              | 15.10        | 0.56             | Y             | conical   | N          |

| Lab no.        | PSU no.  | Sample ID | Rows | Rachis diameter | Rachis segment length | Cupule width | Cupule length | Cupule depth | Cupule shape index (l/w) | Cupule wing width | Cob diameter | Rachis/cob index | Cupule hairs? | Cob shape | Fasciated? |
|----------------|----------|-----------|------|-----------------|-----------------------|--------------|---------------|--------------|--------------------------|-------------------|--------------|------------------|---------------|-----------|------------|
| UCIAMS-173152  | PSU-6948 | EG82      | 12   | 10.04           | 3.67                  | 5.30         | 2.09          | 1.00         | 0.39                     | 1.46              | 15.23        | 0.66             | N             | conical   | N          |
| Beta-171701**  | ---      | S03       | ---  | ---             | ---                   | ---          | ---           | ---          | ---                      | ---               | ---          | ---              | ---           | ---       | ---        |
| UCIAMS-93255   | PSU-4755 | EG15      | 14   | 9.00            | 4.70                  | 5.10         | 2.00          | 0.75         | 0.39                     | 1.50              | 18.44        | 0.49             | Y             | conical   | N          |
| UCIAMS-127388* | PSU-5606 | EG67      | 14   | 7.60            | 2.90                  | 3.30         | 1.40          | 0.75         | 0.42                     | 0.80              | 10.42        | 0.73             | N             | tapered   | N          |
| UCIAMS-127389* | PSU-5607 | EG68      | 14   | 7.53            | 2.70                  | 3.50         | 1.20          | 0.25         | 0.34                     | 1.00              | 9.52         | 0.79             | N             | conical   | N          |
| UCIAMS-128440  | PSU-5629 | EG69      | 12   | 6.60            | 3.80                  | 5.30         | 1.70          | 0.75         | 0.32                     | 1.10              | 14.09        | 0.47             | Y             | tapered   | N          |
| UCIAMS-173154  | PSU-6950 | EG84      | 16   | 10.18           | 2.35                  | 3.99         | 1.44          | 0.75         | 0.36                     | 1.22              | 17.55        | 0.58             | Y             | lancelot  | N          |
| UCIAMS-173157  | PSU-6953 | EG87      | 22   | 16.33           | 3.52                  | 4.60         | 1.22          | 1.00         | 0.27                     | 0.95              | 22.91        | 0.71             | Y             | lancelot  | N          |
| UCIAMS-173147  | PSU-6943 | EG77      | 16   | 13.59           | 3.51                  | 4.44         | 1.94          | 1.00         | 0.44                     | 1.13              | 18.63        | 0.73             | Y             | lancelot  | N          |
| Beta-171701**  | ---      | S03       | ---  | ---             | ---                   | ---          | ---           | ---          | ---                      | ---               | ---          | ---              | ---           | ---       | ---        |
| UCIAMS-93255   | PSU-4755 | EG15      | 14   | 9.00            | 4.70                  | 5.10         | 2.00          | 0.75         | 0.39                     | 1.50              | 18.44        | 0.49             | Y             | conical   | N          |
| UCIAMS-127388* | PSU-5606 | EG67      | 14   | 7.60            | 2.90                  | 3.30         | 1.40          | 0.75         | 0.42                     | 0.80              | 10.42        | 0.73             | N             | tapered   | N          |
| UCIAMS-127389* | PSU-5607 | EG68      | 14   | 7.53            | 2.70                  | 3.50         | 1.20          | 0.25         | 0.34                     | 1.00              | 9.52         | 0.79             | N             | conical   | N          |
| UCIAMS-128440  | PSU-5629 | EG69      | 12   | 6.60            | 3.80                  | 5.30         | 1.70          | 0.75         | 0.32                     | 1.10              | 14.09        | 0.47             | Y             | tapered   | N          |
| UCIAMS-173154  | PSU-6950 | EG84      | 16   | 10.18           | 2.35                  | 3.99         | 1.44          | 0.75         | 0.36                     | 1.22              | 17.55        | 0.58             | Y             | lancelot  | N          |
| UCIAMS-173157  | PSU-6953 | EG87      | 22   | 16.33           | 3.52                  | 4.60         | 1.22          | 1.00         | 0.27                     | 0.95              | 22.91        | 0.71             | Y             | lancelot  | N          |
| UCIAMS-173147  | PSU-6943 | EG77      | 16   | 13.59           | 3.51                  | 4.44         | 1.94          | 1.00         | 0.44                     | 1.13              | 18.63        | 0.73             | Y             | lancelot  | N          |

All measurements reported in millimeters

Reported values for rachis segment length, cupule width, cupule length, cupule depth, and cupule wing width represent the average of measurements from at least 3 separate ranks
